# Supplementary material for: TMT-based quantitative proteomic analysis reveals defense mechanism of wheat against the crown rot pathogen Fusarium pseudograminearum
Source: PubMed Central journal article supplement (PMC7869478; doi:10.1186/s12870-021-02853-6), 2021-02-08
Supplement: 12870_2021_2853_MOESM2_ESM.pdf [file 12870_2021_2853_MOESM2_ESM.pdf]

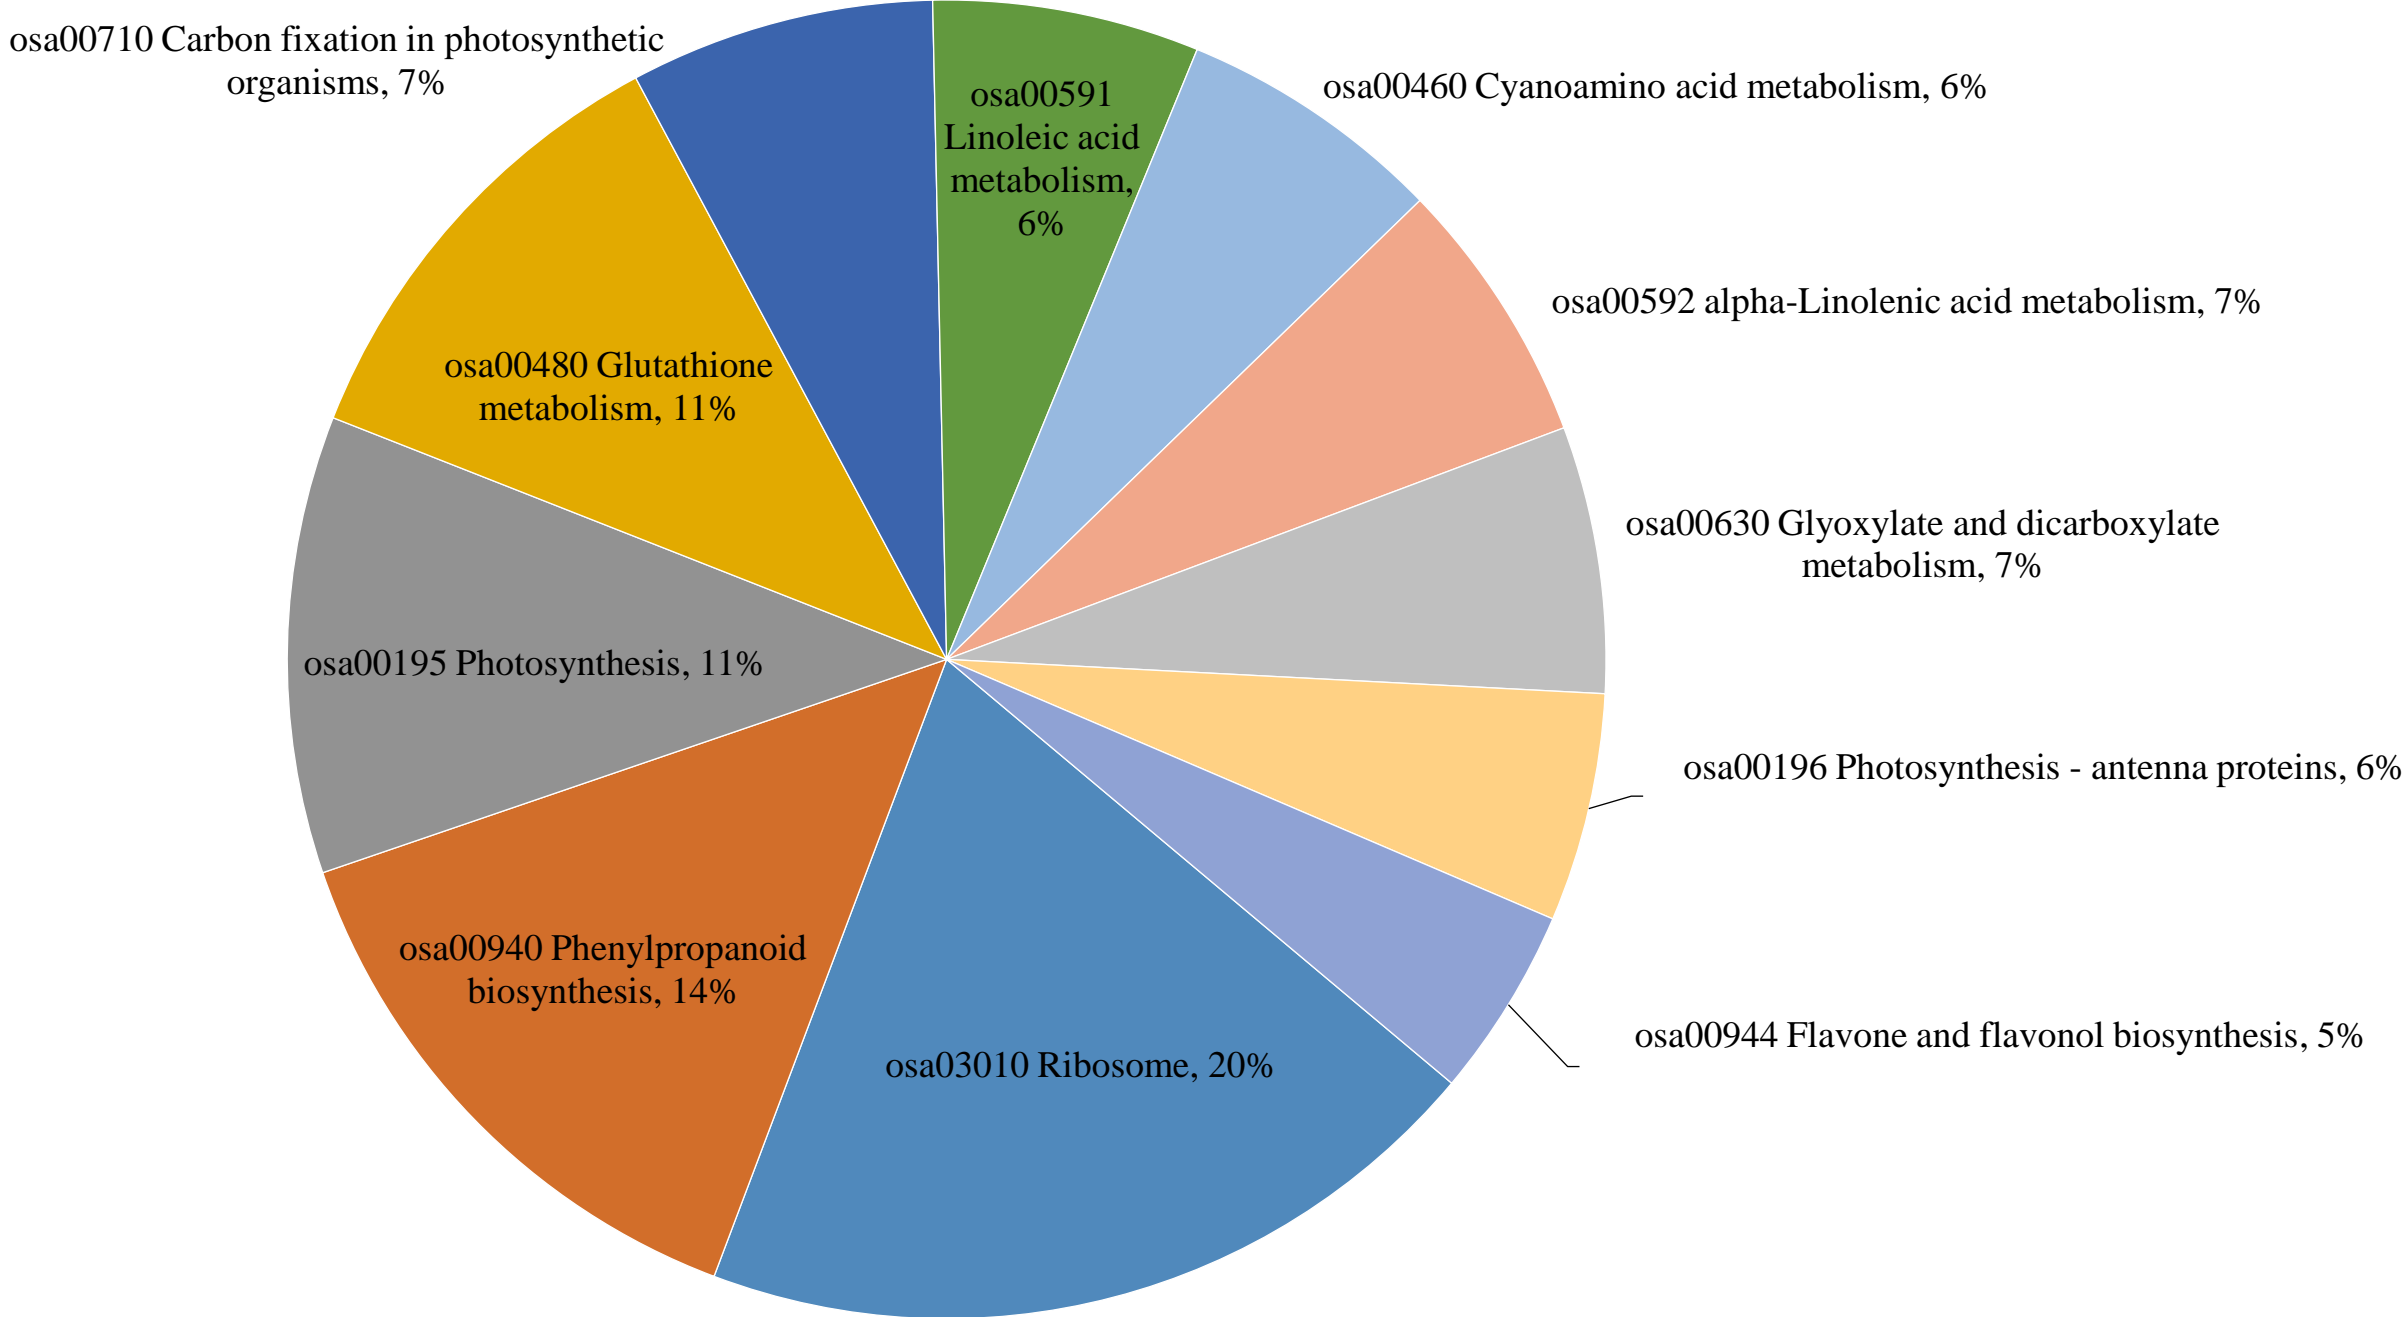

Figure S1. Distribution of all differentially expressed proteins in the KEGG pathway
